# Supplementary material for: Drug Efficacy in the Treatment of Antipsychotic-Induced Akathisia: A Systematic Review and Network Meta-Analysis
Source: PubMed Central journal article supplement (PMC10921255; doi:10.1001/jamanetworkopen.2024.1527), 2024-03-07
Supplement: jamanetwopen-e241527-s002.pdf [file jamanetwopen-e241527-s002.pdf]

## Data Sharing Statement

Gerolymos. Drug Efficacy in the Treatment of Akathisia. *JAMA Netw Open*. Published March 07, 2024. doi:10.1001/jamanetworkopen.2024.1527

### Data

**Data available:** Yes

**Data types:** Data (not involving human participants)

**How to access data:** guillaume.fond@ap-hm.fr

**When available:** With publication

### Supporting Documents

**Document types:** None

### Additional Information

**Who can access the data:** researchers whose proposed use of the data has been approved

**Types of analyses:** for a specified purpose

**Mechanisms of data availability:** with investigator support with a signed data access agreement).
